# Supplementary material for: Differential Roles of Tubby Family Proteins in Ciliary Formation and Trafficking
Source: PubMed Central journal article supplement — Mol Cells. 2021 Aug 24;44(8):591–601. doi: 10.14348/molcells.2021.0082 (PMC8424140; doi:10.14348/molcells.2021.0082), 2021-08-24
Supplement: molce-44-8-591-Supple.pdf [file molce-44-8-591-Supple.pdf]

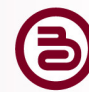

**Supplementary Table S1.** Sequences of qPCR primers

| Gene         | Forward                    | Reverse                    |
|--------------|----------------------------|----------------------------|
| <i>TULP1</i> | 5'-ACCCTACCAATCTGTCCCGA-3' | 5'-TTAGTGCTGTACCCACGCTG-3' |
| <i>TULP2</i> | 5'-TCCCTCTGAGCCGCTTTCT-3'  | 5'-AGCTTCTGCAGCCTCATAGC-3' |
| <i>TULP3</i> | 5'-AAAAGGGGAATGGATCGGGG-3' | 5'-GCTGTTTTGCTTTTTCCGC-3'  |
| <i>TUB</i>   | 5'-TGGGCACCAAGTTCAGTGT-3'  | 5'-CCTGGGACAATCACGCTCAT-3' |
| <i>GAPDH</i> | 5'-GAGTCAACGGATTTGGTC-3'   | 5'-TTGATTTTGGAGGGATCT-3'   |

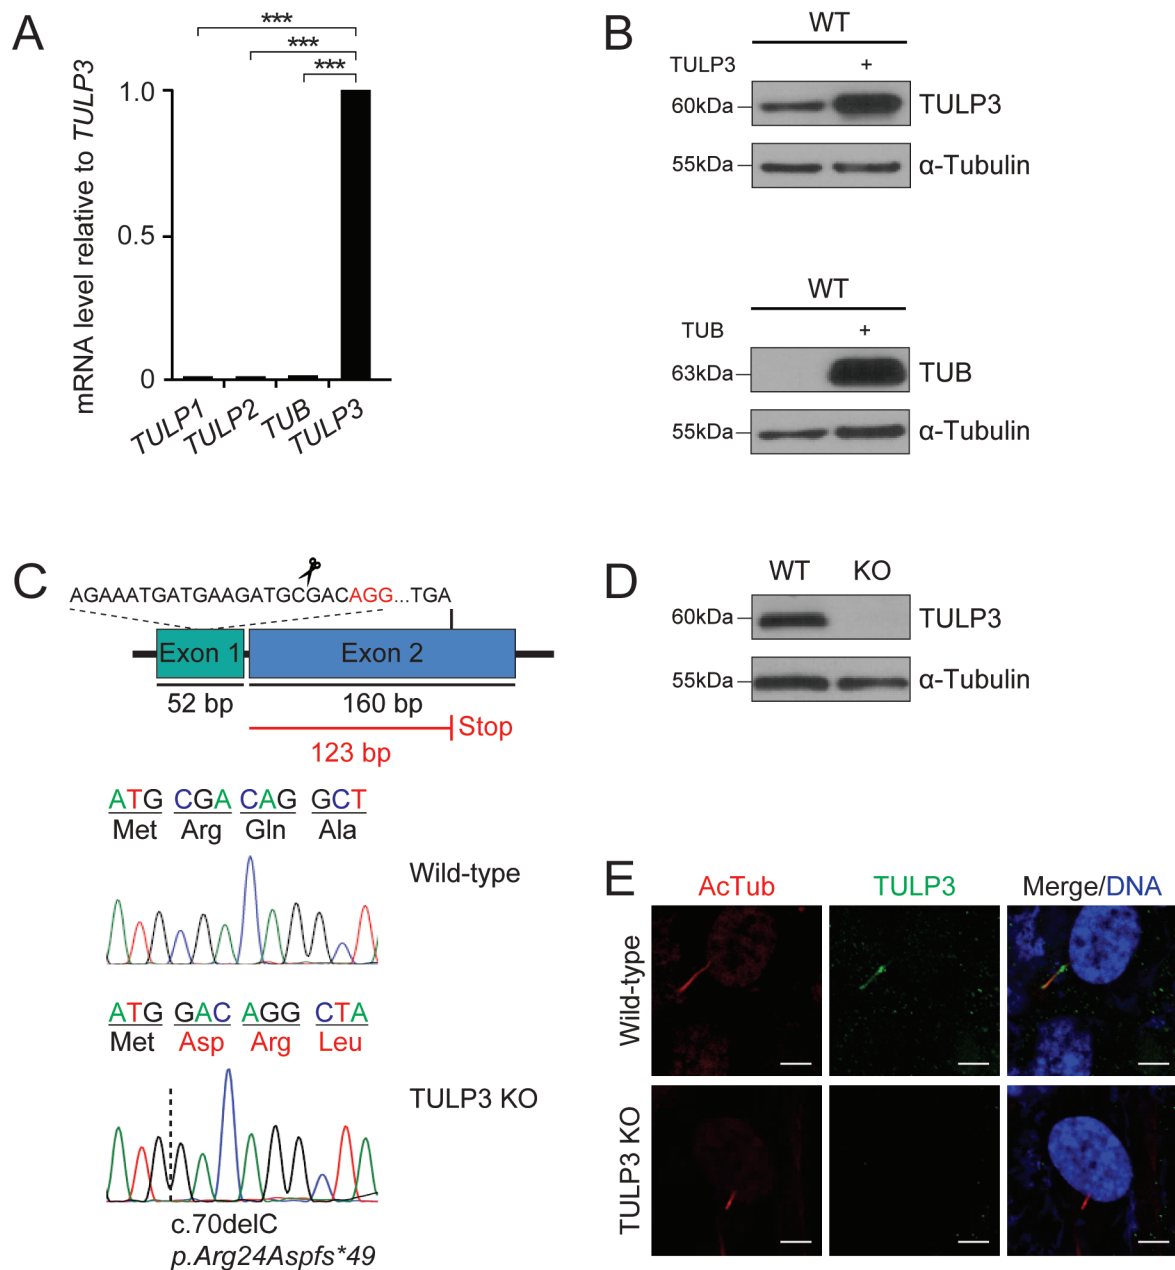

**Supplementary Fig. S1. Generation of a TULP-free RPE1 cell line using CRISPR/Cas9.** (A) Transcript levels of each *TULP* in RPE1 cells examined by quantitative RT-PCR. Data are presented as means  $\pm$  SEM from four independent experiments. One-way ANOVAs with Tukey's *post-hoc* tests. \*\*\* $P < 0.001$ . (B) Immunoblot analysis for TULP3 and TUB in RPE1 cells. Ectopic expression of each protein was loaded as a control in the right lane. (C) Generation of a TULP-free RPE1 cell line (*TULP3* KO RPE1) using CRISPR/Cas9. Above, schematic showing the targeted region of the *TULP3* genomic locus, specifically the gRNA targeted sequence in exon 1. Below, alignment comparing control and *TULP3* KO RPE1 cells. It confirms the presence of a frameshift mutation in exon 1 and the resulting premature stop codon at the distal end of exon 2. (D) Immunoblot analysis for TULP3 in wild-type and *TULP3* KO RPE1 cells. (E) Immunocytochemical analysis of TULP3 in wild-type and *TULP3* KO RPE1 cells. Cells were stained for the axonemal marker Ac-tubulin and TULP3. Nuclei were stained with To-Pro3. Scale bars, 5  $\mu$ m.

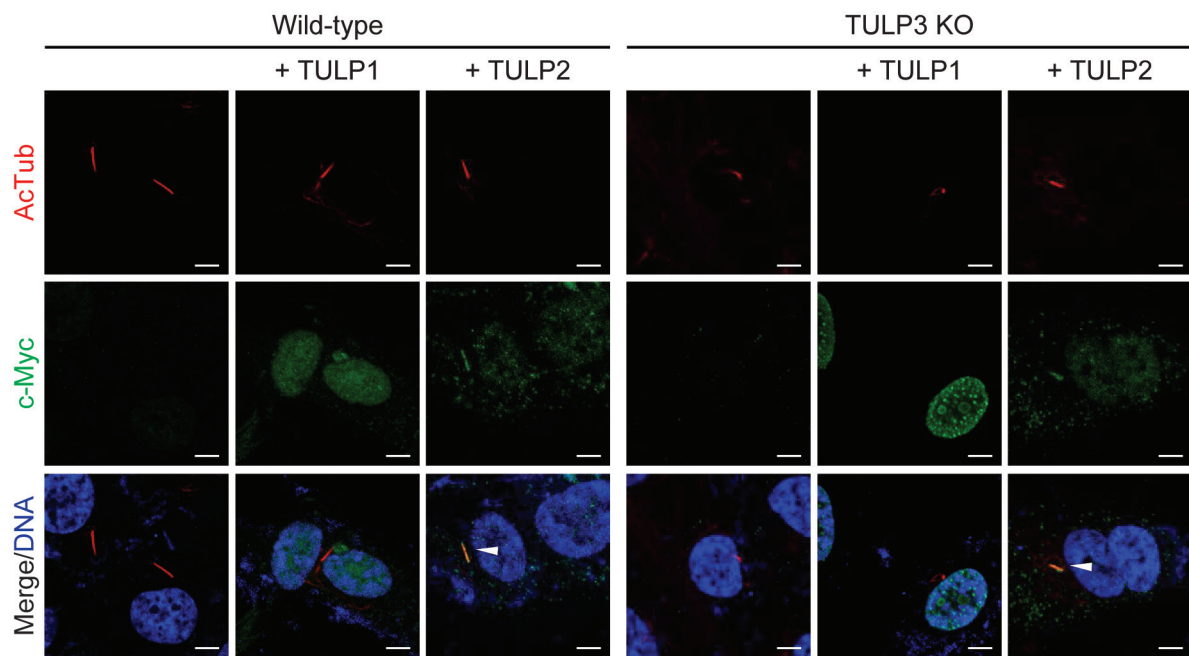

**Supplementary Fig. S2. Localization of TULP1 and TULP2 in RPE1 cells.** Immunocytochemical analysis of TULP1 and TULP2 in wild-type and *TULP3* KO RPE1 cells. Cells were stained with antibodies specific for the axonemal marker Ac-tubulin, as well as c-Myc for TULP1 and TULP2. Nuclei were stained with To-Pro3. TULP2-positive cilia are marked by arrowheads. Scale bars, 5  $\mu$ m.

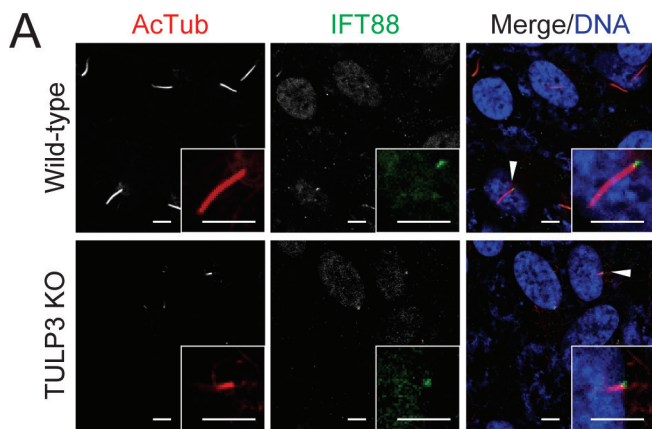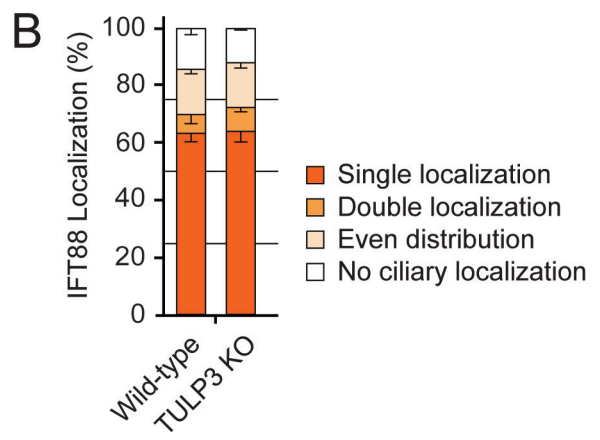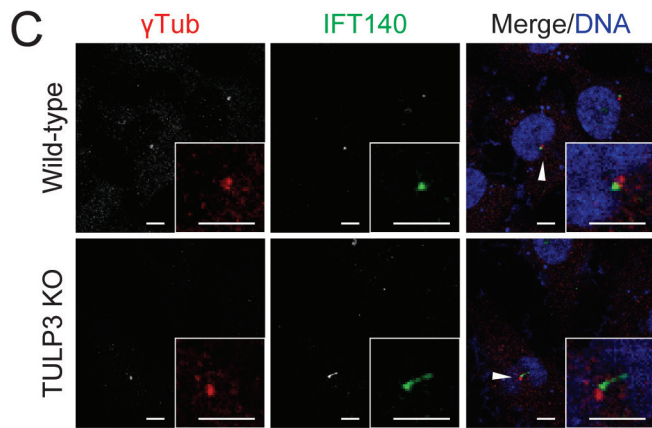

**Supplementary Fig. S3. TULP3 functions differently in the ciliary regulation of IFT140 (IFT-A) and IFT88 (IFT-B).** (A) Wild-type and *TULP3* KO RPE1 cells, stained with antibodies specific for the axonemal marker Ac-tubulin, IFT88, and To-Pro3. Insets, enlarged images of the cilia marked with arrowheads. Scale bars, 5  $\mu$ m. (B) Quantification of IFT88 localization. Data are presented as means  $\pm$  SEM from three independent experiments. 90-120 ciliated cells were counted for each condition. Pearson's  $\chi^2$  test. (C) IFT140 localization in wild-type and *TULP3* KO RPE1 cells stained with antibodies specific for the ciliary base marker  $\gamma$ -tubulin, IFT140, and To-Pro3. Insets, enlarged images of the cilia marked with arrowheads. Scale bars, 5  $\mu$ m.

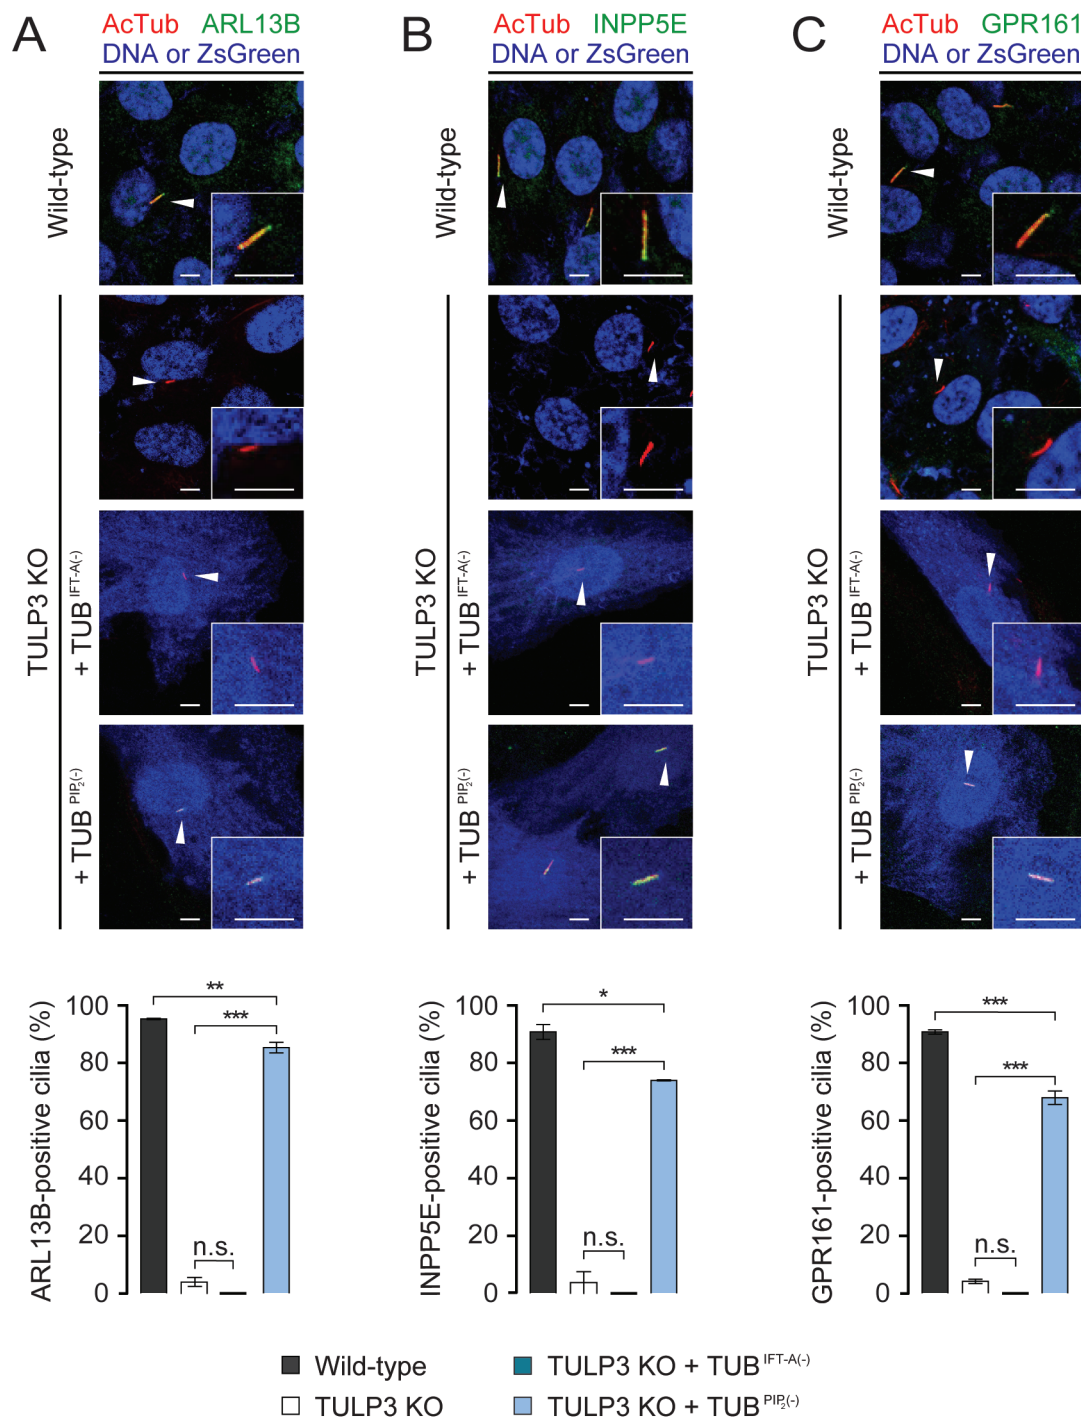

**Supplementary Fig. S4. TUB's IFT-A-binding domain is essential for ciliary membrane protein trafficking.** (A-C) Wild-type RPE1 and *TULP3* KO RPE1 cells, transfected with the indicated forms of TUB. Cells were stained with antibodies specific for the axonemal marker Ac-tubulin, as well as for ARL13B (A), INPP5E (B), and GPR161 (C). Transfected cells were identified with ZsGreen. Non-transfected cells were identified with the nuclear marker To-Pro3. Insets, enlarged images of the cilia marked with arrowheads. Scale bars, 5  $\mu$ m. A quantification of the cilia positive for each protein appears below each set of images. Data are presented as means  $\pm$  SEM from three independent experiments. More than 100 ciliated cells were observed per condition. One-way ANOVAs with Tukey's *post-hoc* tests. \* $P < 0.05$ , \*\* $P < 0.01$ , \*\*\* $P < 0.001$ .

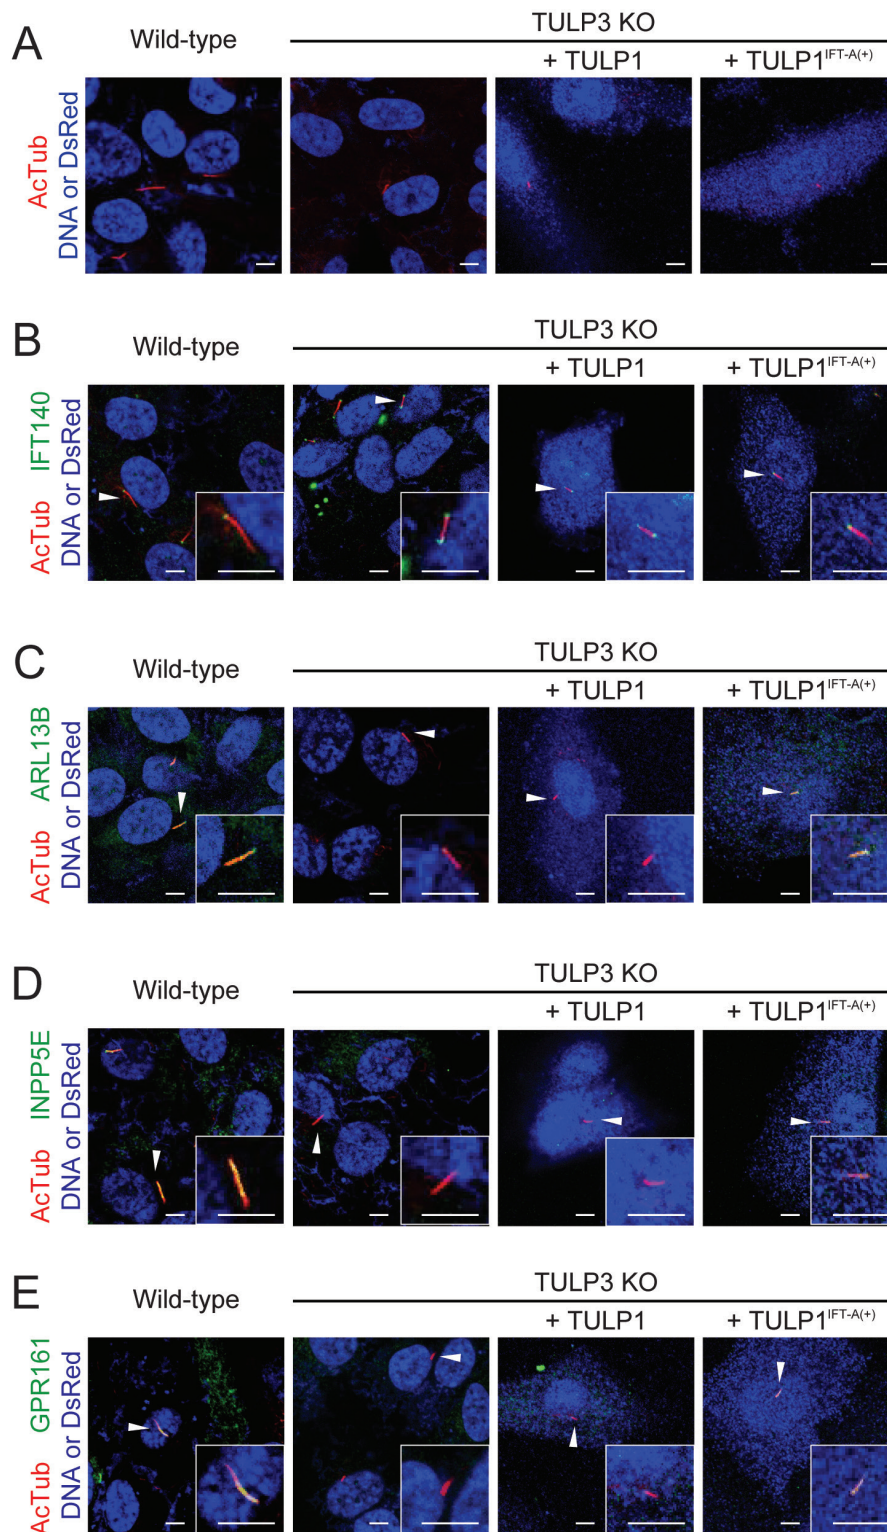

**Supplementary Fig. S5. Improving TULP1's IFT-A-binding properties enhances ciliary membrane protein trafficking.** (A) Wild-type RPE1 and *TULP3* KO RPE1 cells, transfected with the indicated forms of TULP1. Cells were stained with antibodies specific for the axonemal marker Ac-tubulin. Transfected cells were identified with DsRed staining. Nontransfected cells were identified with the nuclear marker To-Pro3. Scale bars, 5 μm. (B-E) Wild-type and *TULP3* KO RPE1 cells, transfected with the indicated forms of TULP1. Cells were stained with antibodies specific for the axonemal marker Ac-tubulin, as well as for IFT140 (B), ARL13B (C), INPP5E (D), and GPR161 (E). Transfected cells were identified with DsRed staining. Non-transfected cells were identified with the nuclear marker To-Pro3. Insets, enlarged images of cilia marked with arrowheads. Scale bars, 5 μm.
